# Supplementary material for: The DNA damage response activates HPV16 late gene expression at the level of RNA processing
Source: PubMed Central journal article supplement — Nucleic Acids Res. 2018 Mar 27;46(10):5029–49. doi: 10.1093/nar/gky227 (PMC6007495; doi:10.1093/nar/gky227), 2018-03-27
Supplement: gky227_supp.pdf [file gky227_supp.pdf]

### Supplementary Figure legends.

**Supplementary Figure S1 (A)** RT-PCR with HPV16 L1 mRNA specific primers 773s and L1as on total RNA extracted from the C33A2 reporter cell line treated with 50- or 100-uM of melphalan for 22hrs (for location of primers see Fig. 1A). The bands were quantified, mean values and standard deviations determined and plotted in the graph to the right. The percentage spliced L1i and L1 mRNAs were calculated and indicated below the gel. Percentages refer to percent spliced L1i mRNAs of L1 and L1i mRNAs. This calculation is shown separately for C33A2 cells treated with 50uM melphalan and 100uM melphalan. **(B)** Schematic representation of ATRIP1 mRNA which encodes the DDR factor ATRIP1. Exons E3 and E12 that may be alternatively spliced are indicated. Arrows indicate RT-PCR primers that are used to discriminate between alternatively spliced ATRIP mRNAs. **(C)** RT-PCR with the indicated ATRIP primers on RNA extracted from DMSO- or melphalan- (100uM) treated C33A2 cells. RT-PCR over exons E2, E3 and E4 shows no indication of alternative splicing induced by melphalan, whereas RT-PCR over exons E11, E12 and E13 shows alternative splicing of exon E12 in the presence of melphalan. **(D)** RT-PCR with primers for the cellular PHB2 mRNA on total RNA extracted from the C33A2 reporter cell line treated with DMSO alone or 100-uM of melphalan for 22hrs. The two alternatively spliced PHB2 mRNAs are indicated. The results demonstrate alternative splicing of exon E-ALT (located between exons E4 and E5) in the presence of melphalan. RT-PCR reactions were performed in the absence (-) or presence (+) of RT-enzyme. Percent inclusion of the alternatively spliced exon is indicated below each gel.

**Supplementary Figure S2 (A-E)** Western blots with monospecific antibodies to various DNA damage response factors (ATM, Chk1, Chk2, BRCA1) or phosphorylated, activated forms of the same factors, and  $\gamma$ H2AX, in C33A2 cells treated with DMSO or melphalan for the indicated time points. Densitometric quantitations are shown below each gel. Fold difference of the phosphorylated form of the protein over total levels of the same protein in melphalan-treated cells over DMSO-treated cells (ATM (3hs, 6hrs, 22hrs) **(A)**, Chk1 (22hrs) **(B-right panel)**, Chk2 (22hrs) **(C-right panel)**) in which the phosphorylated form could be detected in DMSO treated cells, or as fold difference of the phosphorylated form of the protein over total levels of the same protein (Chk1 (3hs, 6hrs)**(B-left panel)**, Chk2 (3hs, 6hrs)**(C-left panel)**) in which the phosphorylated form could not be detected in DMSO treated cells. **(D)** Levels of phosphorylated BRCA1 at the various time points after addition of melphalan to C33A2 cells are normalized to actin. **(E)** Levels of  $\gamma$ H2AX at the various time points after addition of melphalan are normalized to actin and expressed as fold over levels in DMSO-treated cells.

**Supplementary Figure S3 (A)** Western blotting with antibody to phosphorylated BRCA1 (p-BRCA1) on extracts from C33A2 cells treated with DMSO, 100uM melphalan or 100uM irinotecan. Quantitations of phosphorylated BCRA1 normalized to actin and to the levels of phosphorylated BRCA1 in DMSO treated cells. Ratios are shown below the gel. **(B)** Western blotting with antibodies to ATM or phosphorylated ATM (p-ATM) on extracts from C33A2 cells treated with DMSO, 100uM melphalan or 100uM irinotecan. Quantitations of phosphorylated ATM divided by total levels of ATM in DMSO treated cells. Ratios are shown below the gel. **(C)** Secreted luciferase enzyme activity (sLuc) in the cell culture medium of reporter cell line C33A2 treated with DMSO, 100uM melphalan or 100uM irinotecan. **(D)** RT-PCR with HPV16 L1 mRNA specific primers 773s and L1as on total RNA extracted from the C33A2 reporter cell line treated with DMSO, 100uM of melphalan or 100uM irinotecan (for location of primers see Fig. 1A). Quantified RT-PCR bands in melphalan- or irinotecan- treated cells were divided by L1 mRNA levels in DMSO treated cells. Ratios are shown below the gel.

**Supplementary Figure S4 (A)** C33A2 cells were incubated in DMSO or 100uM of melphalan for the indicated time periods. At each indicated time-point, cells were retrieved, counted and plotted against time in each substance. **(B)** C33A2 cells were incubated in DMSO or 100uM of melphalan for the indicated time periods. Cells were subjected to MTT assay at the indicated

time points to determine cell viability. MTT results were plotted against time. **(C)** Western blot analysis on extracts from C33A2 cells incubated in melphalan for the indicated time points with antibodies that detect PARP1 and the apoptosis-induced 89kDa cleavage product of PARP1 (left panel). Detection of cleaved PARP1 in control cells HN26 are shown (right panel). HN26 cells are HPV16-positive tonsillar cancer cells that will be described elsewhere. Quantitations were performed and are displayed as percentage PARP1 cleavage below the gels.

**Supplementary Figure S5** sLuc activity in C33A2 cells treated with DMSO (-) or 100uM melphalan (+) in the absence (-) or presence (+) of MAPKp38 inhibitor SB203580 (left panel), or in the absence (-) or presence (+) of DNApk inhibitor NU7026 (right panel).

**Supplementary Figure S6 (A)** Schematic representation of the pBELsLuc reporter plasmid stably integrated in the genome of the C33A2 cells. Transcription of the HPV16 sequences in the pBELsLuc plasmid is driven by the human cytomegalovirus promoter (CMV). The sLuc gene inserted into the L1 region is indicated and is preceded by the poliovirus 2A internal ribosome entry site (IRES). Arrows represent ChIP PCR primers (See supplementary Table 1 for primer sequences). **(B)** Schematic representation of the pBELCAT reporter plasmid. Transcription of the HPV16 sequences in the pBELCAT plasmid is driven by the human cytomegalovirus promoter (CMV). The CAT gene inserted into the L1 region is indicated and is preceded by the poliovirus 2A internal ribosome entry site (IRES). **(C)** Schematic representation of the pBELsLuc reporter plasmid. The primers (CMVS and 757as) used for amplification of all mRNAs produced from pBELsLuc in the C33A2 cell line are indicated.

**Supplementary Figure S7 (A)** Western blots on acetylated histone H3 (H3Ac) or total levels of histone 3 (H3) in C33A2 cells treated with DMSO, HDAC inhibitor CUDC-907 or melphalan for the indicated time points. Quantitations below the gels show H3Ac normalized to H3 and divided by H3Ac levels in DMSO treated cells. **(B–C)** ChIP analysis on chromatin from C33A2 cells using antibodies to H3Ac or H4Ac and qPCR of the indicated HPV16 amplicons. The ChIP results obtained with antibodies to acetylated histones H3Ac and H4Ac, were all normalized to ChIP results of the same chromatin samples obtained with antibodies to unmodified histones H3 and H4, respectively. Mean values with standard deviations of the amount of immunoprecipitated DNA compared to input DNA are displayed. The q-PCR values obtained for each primer pair with DNA extracted from DMSO-treated C33A2 cells were set to 1 to correct for differences between different ChIP extracts. Chip extracts were prepared from C33A2 cells treated with melphalan for the indicated time-periods. All samples were analyzed in two independent ChIP assays and all qPCR reactions were performed in triplicates.

**Supplementary Figure S8 (A)** Western blot on phosphorylated SR proteins in C33A2 cells treated with DMSO (D) or with 100uM melphalan (M) for 6hrs, or with 25-, 50- or 100uM melphalan for 6hrs. **(B)** Quantitation of the Western blot shown in (A). Fold SR protein levels in cells treated with indicated concentrations of melphalan over SR protein levels in DMSO-treated cells are shown. **(C)** ChIP analyses on C33A2 cells using antibody to phosphorylated SR proteins and qPCR of the indicated HPV16 amplicons as described for Figure 7D. **(D)** C33A2 cells treated with DMSO or melphalan for the indicated time points were UV irradiated and subjected to CLIP assay as detailed in Materials and methods. The RNA-protein complexes were immunoprecipitated with antibodies to phosphorylated SR proteins, hnRNP G or HuR and the RNA extracted from the immunoprecipitated complexes were subjected to RT-PCR with primers that detect HPV16 E4 mRNAs spliced from SD880 to SA3358. The location in the HPV16 genome of the HPV16 RT-PCR primers is shown in Figure 1A, primer sequences are shown in Supplementary Table 3 and antibodies are listed in Supplementary Table 4.

**Supplementary Figure S9 (A)** Schematic drawing of the HPV16 genome with a blow-up of the region around the E4 exon bordered by HPV16 splice sites SA3358 and SD3632. The 35-nucleotide biotinylated ssDNA oligos (overlapping by 5-nucleotides) used in pull down assays

are indicated. **(B)** Western blot with antibody to U2AF65 on proteins pulled down with the indicated biotinylated oligos using cellular extracts prepared from C33A2 cells treated with DMSO (-) or melphalan (+) for 6hrs. Ratios of quantified levels of U2AF65 in melphalan treated cells (+) over levels of pulled down U2AF65 in DMSO-treated cells (-) are shown below the gel. **(C)** As an additional control for specificity, pull downs of U2AF65 or hnRNP C with oligo 8 from extracts of C33A2 cells treated for various time periods with melphalan are shown. While hnRNP C is readily observed after pull down, U2AF65 is undetectable. **(D)** Western blot on U2AF65 on pull-downs with biotinylated HPV16 ssDNA oligo #1 (wt), or antisense version of oligo #1 (mut) to show sequence-specific pull down of U2AF65. Ratio of quantified levels of U2AF65 pulled down by wild-type (wt)-oligo over antisense oligo (mutant) is shown below the gel. **(E)** Western blot with antibody to U2AF65 on proteins pulled down with the indicated biotinylated oligos using cellular extracts prepared from C33A2 cells treated with DMSO (-) or melphalan (+) for the indicated time periods. **(F)** Western blot on pull-downs with biotinylated RNA oligos.

**Supplementary Figure S10** Western blot on the indicated polyadenylation factors in C33A2 cells or C33A2 cells treated with DMSO or 100uM melphalan for the indicated time points. Bands were quantified and normalized to actin then divided by the levels of each protein in DMSO-treated cells. Ratios are shown below each gel.

**Supplementary Figure S11 (A)** C33A2 cells treated with DMSO or 100uM melphalan for the indicated time points were subjected to UV radiation to cross-link RNA and protein prior to cell lysis. Cells were lysed in total cell lysis-buffer (Materials and Methods) and 5% of the cell extract was saved and subjected to Western blotting with monoclonal antibodies to hnRNP C and U2AF65 (input) **(A)**. The remaining cell extracts were mixed with oligodT-magnetic beads to extract polyA mRNAs and proteins cross linked to these mRNAs. Following multiple washes in RIPA buffer, the proteins were eluted by RNase treatment of the beads, and subjected Western blotting with monoclonal antibodies to hnRNP C and U2AF65 (pull-down) **(B)**. The bands in each lane were quantified and ratios of protein levels in melphalan (M) treated cell over DMSO (D) treated cells were determined. The ratios are shown below each gel. **(C)** Ratios of hnRNP C or U2AF65 levels in melphalan versus DMSO in pulled down samples were divided with ratios of hnRNP C or U2AF65 levels in melphalan versus DMSO in input samples. These ratios are displayed and show that at least after 3hrs of melphalan treatment, the increases in RNA binding of hnRNP C and U2AF65 is bigger than the increase in levels of these proteins in the cells.

A HPV16

L1 mRNAs:

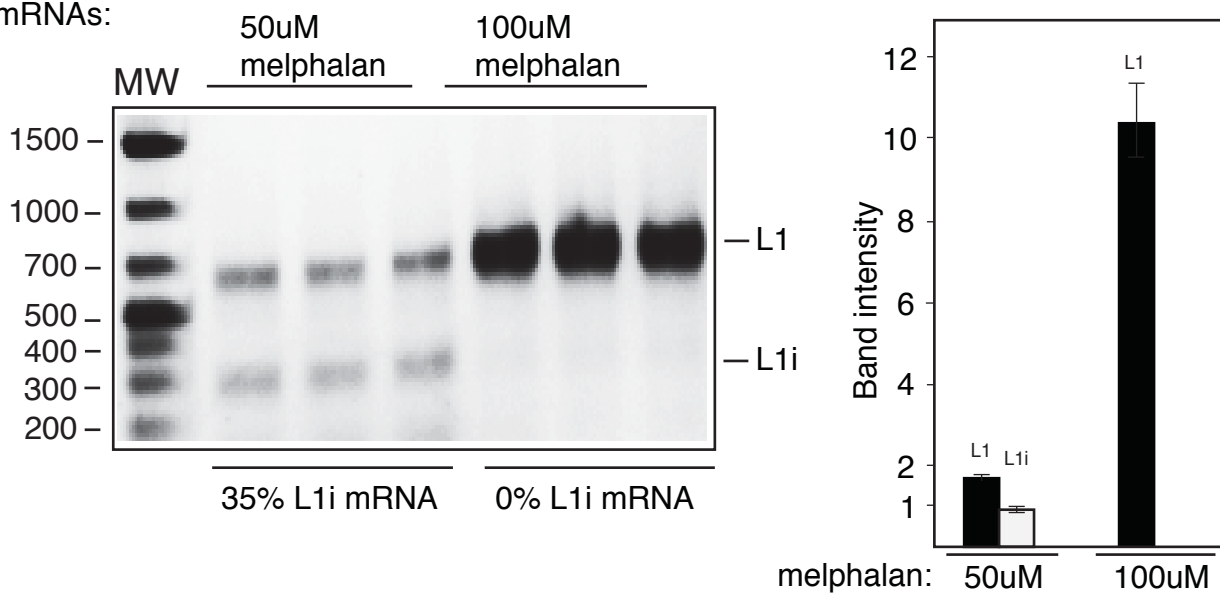

B ATRIP mRNAs

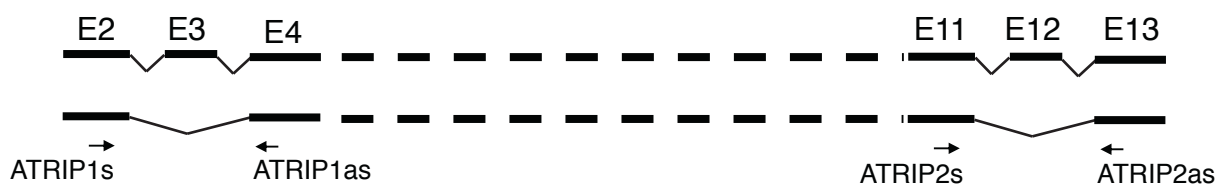

C

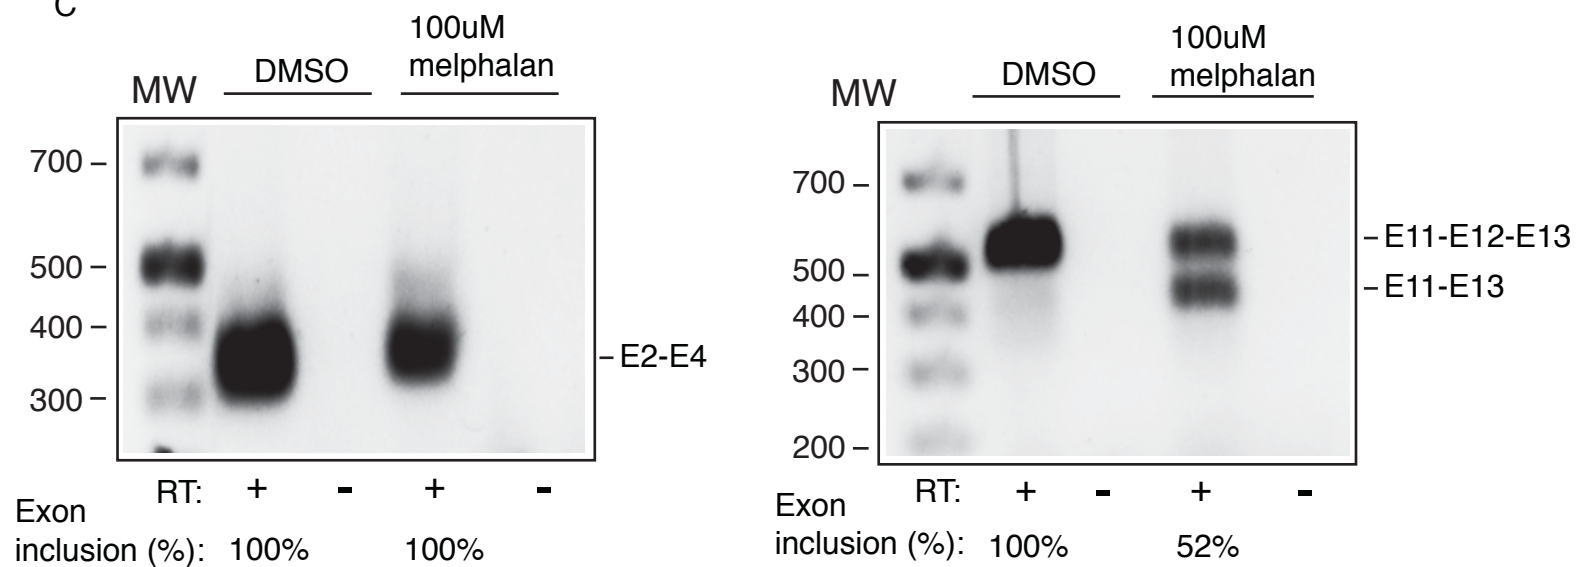

D

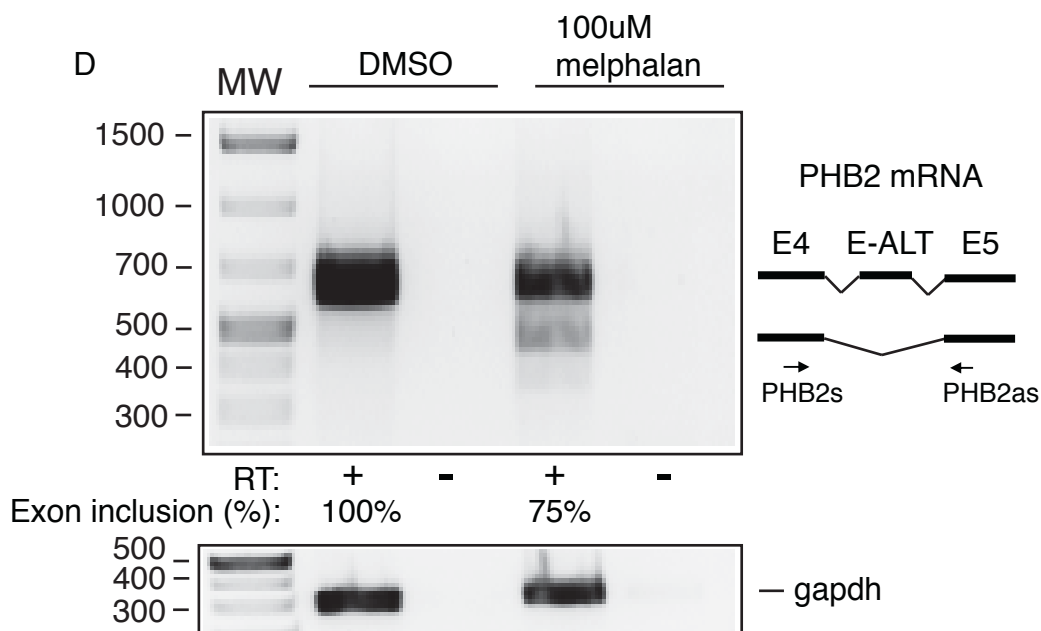

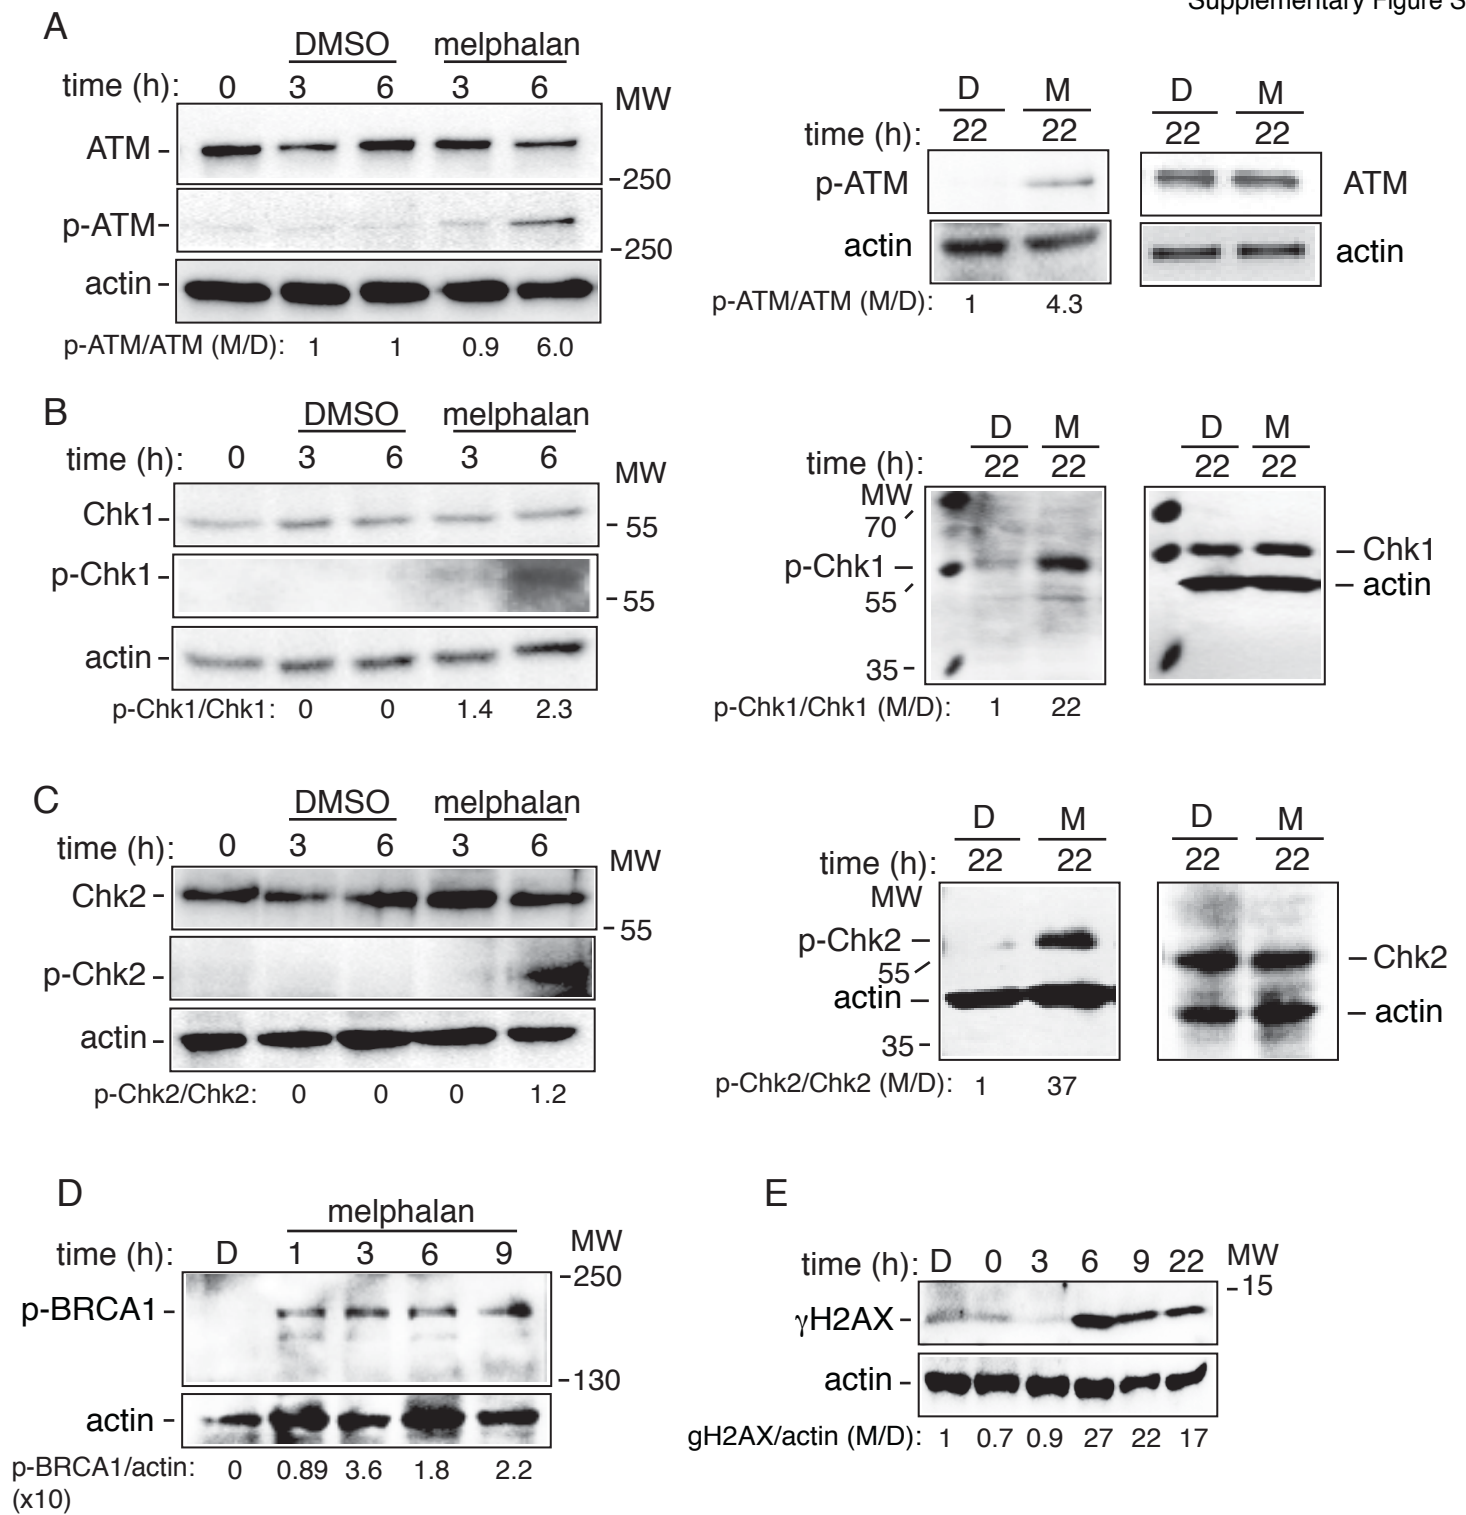

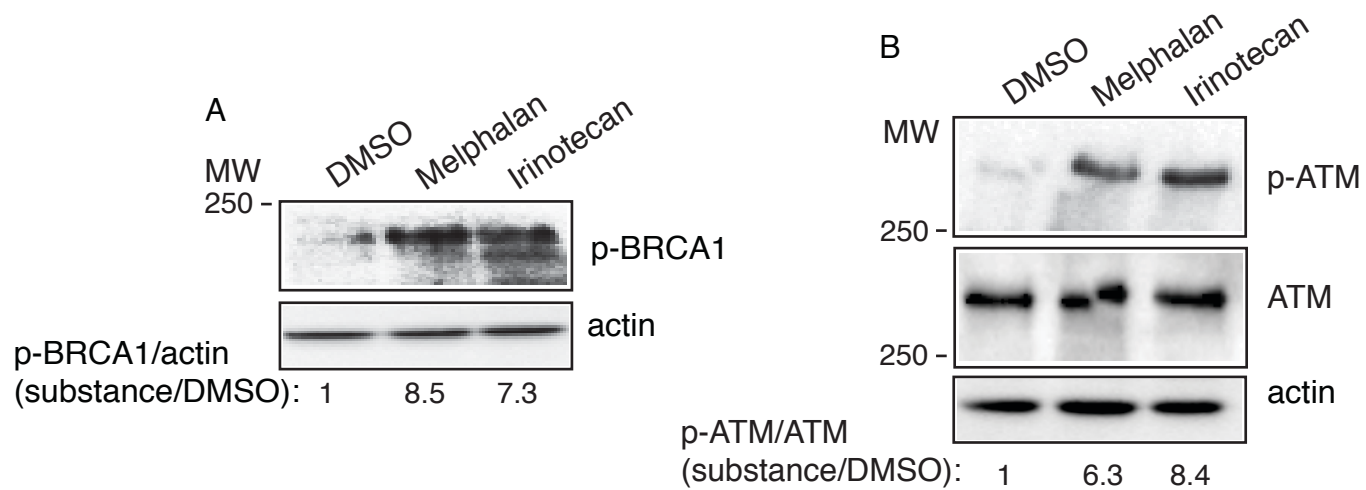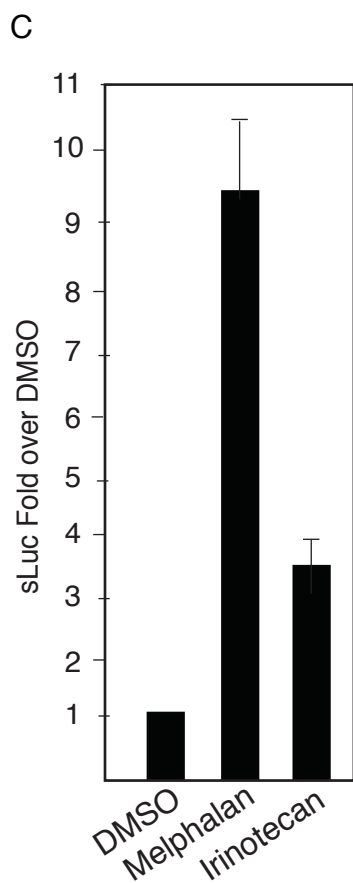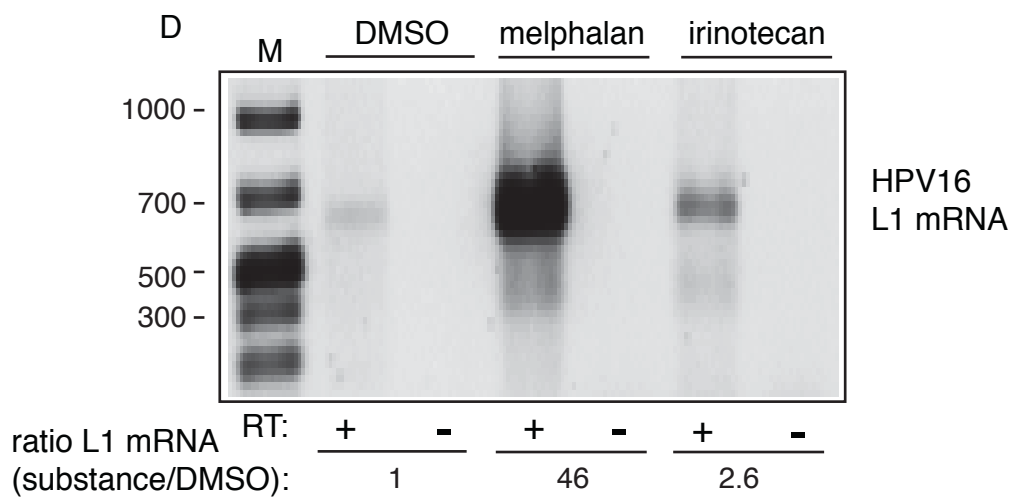

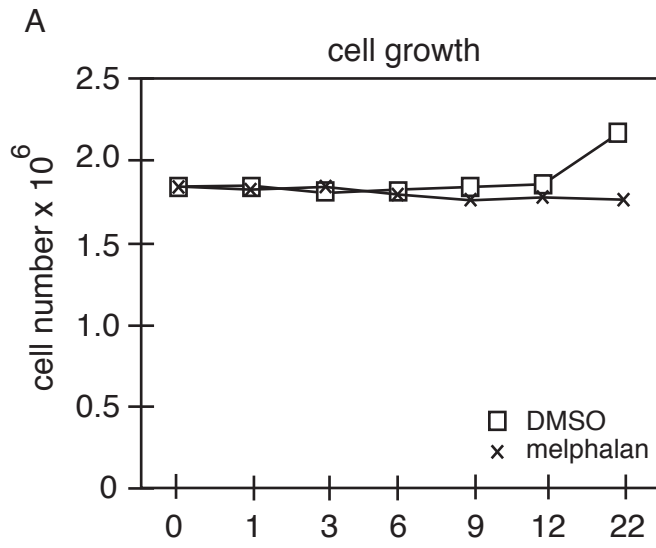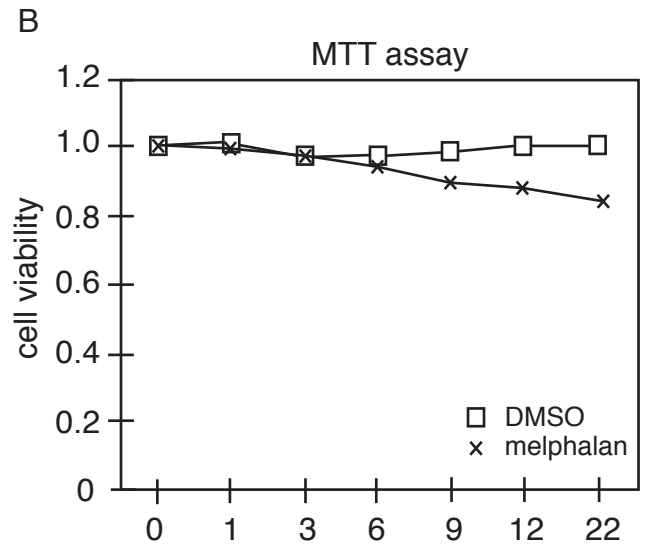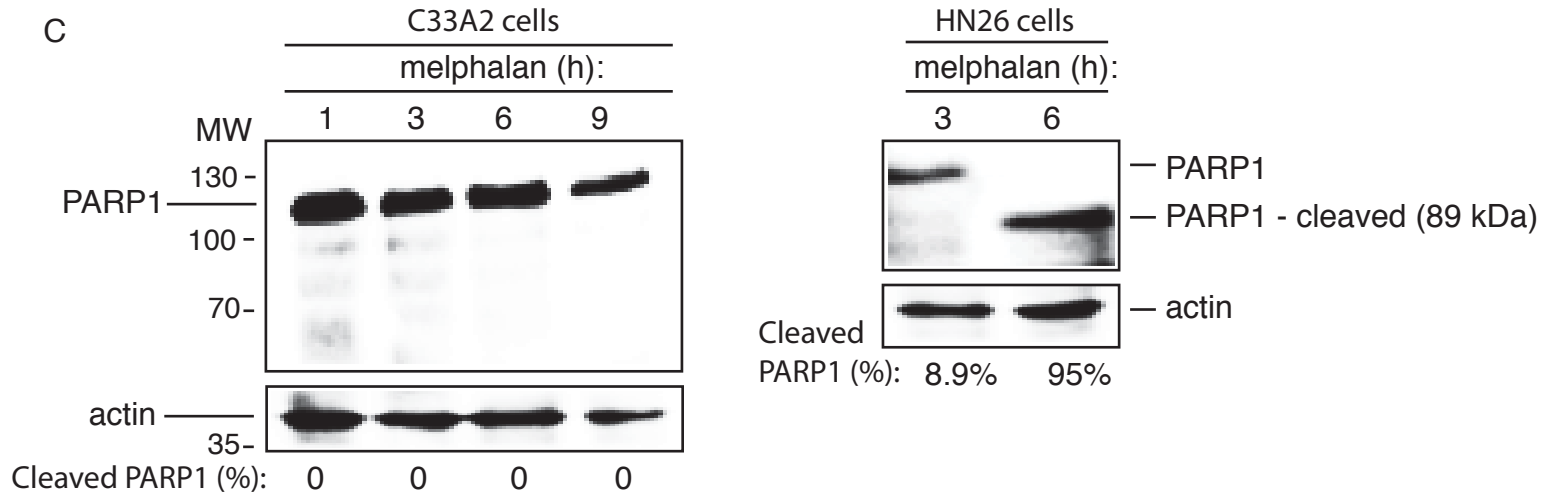

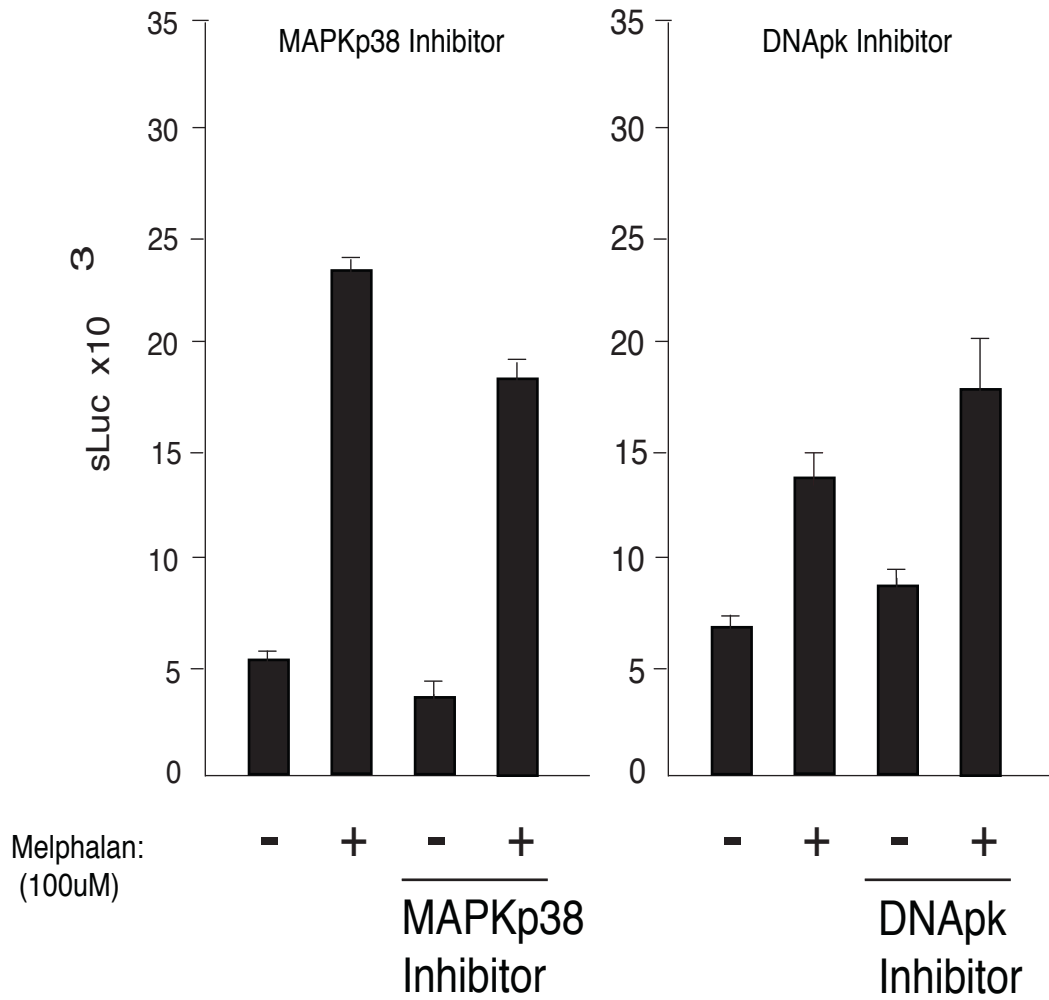



A

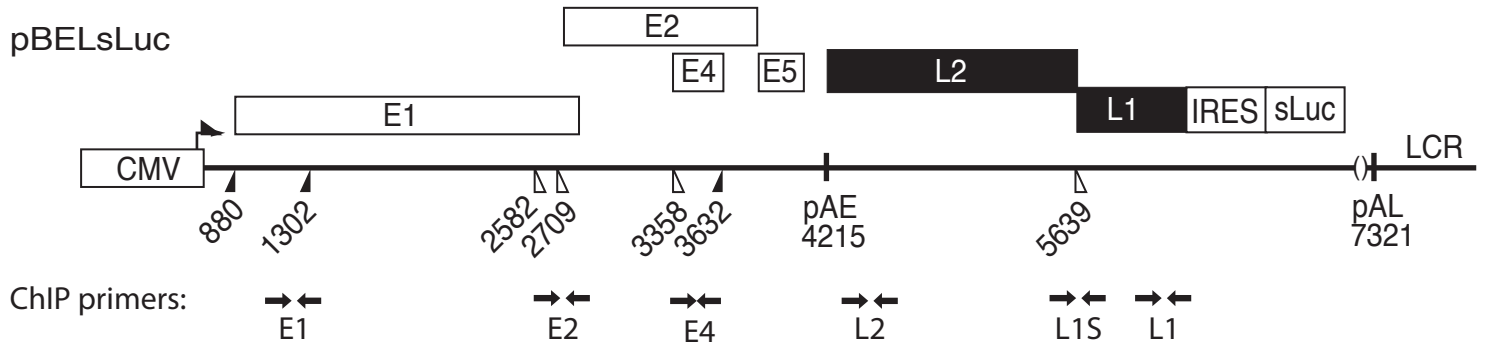

B

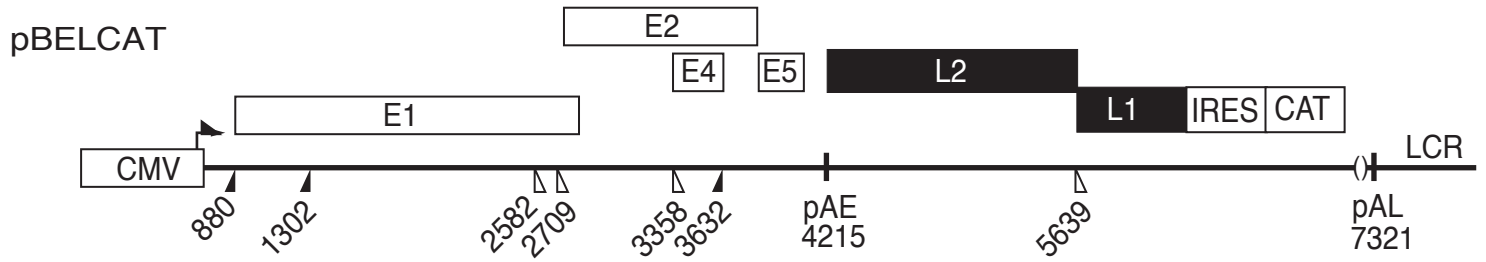

C

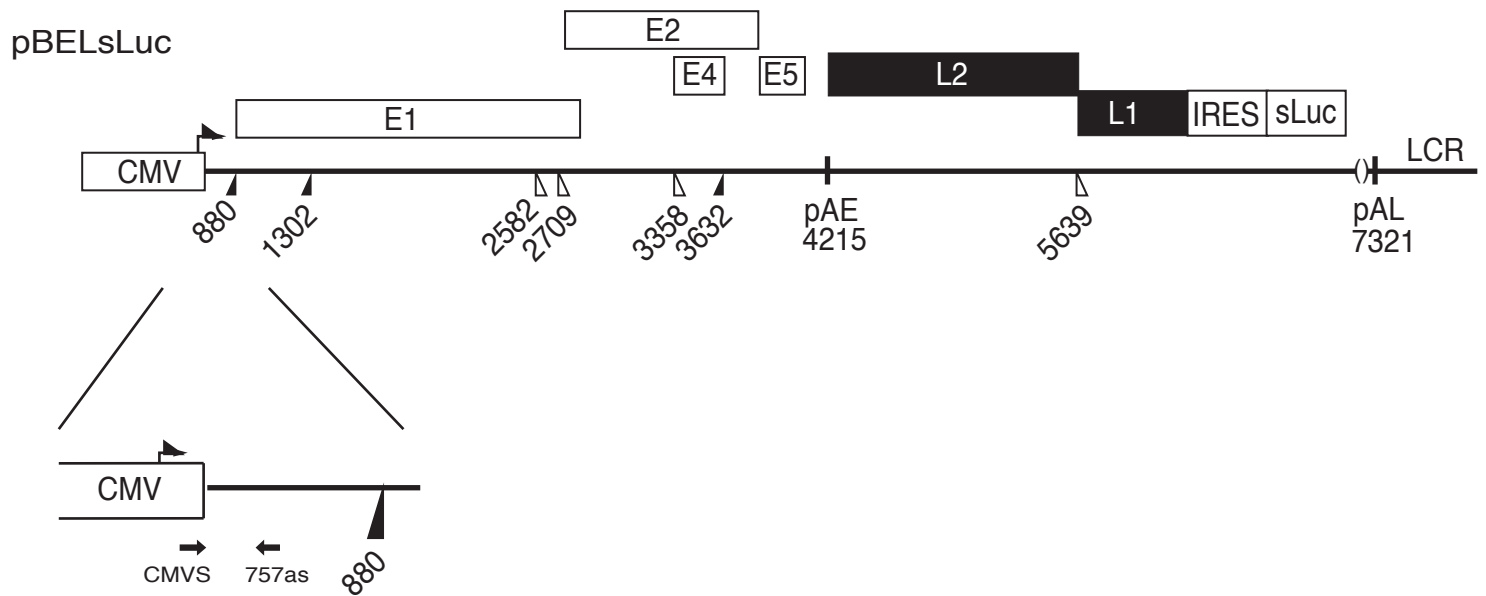

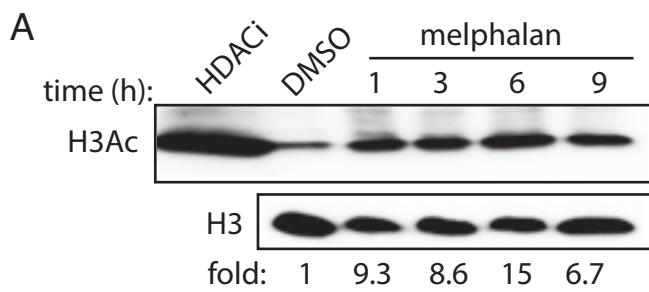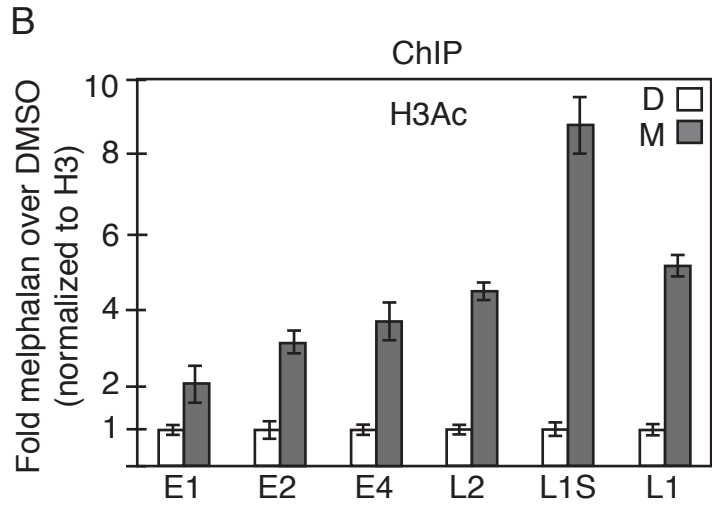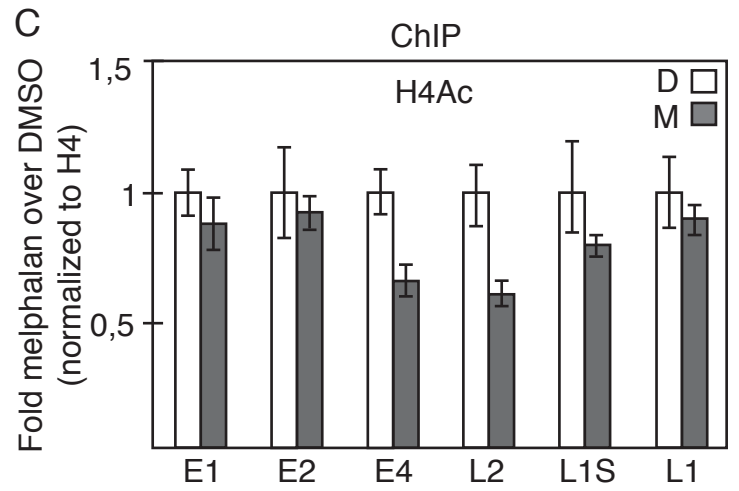

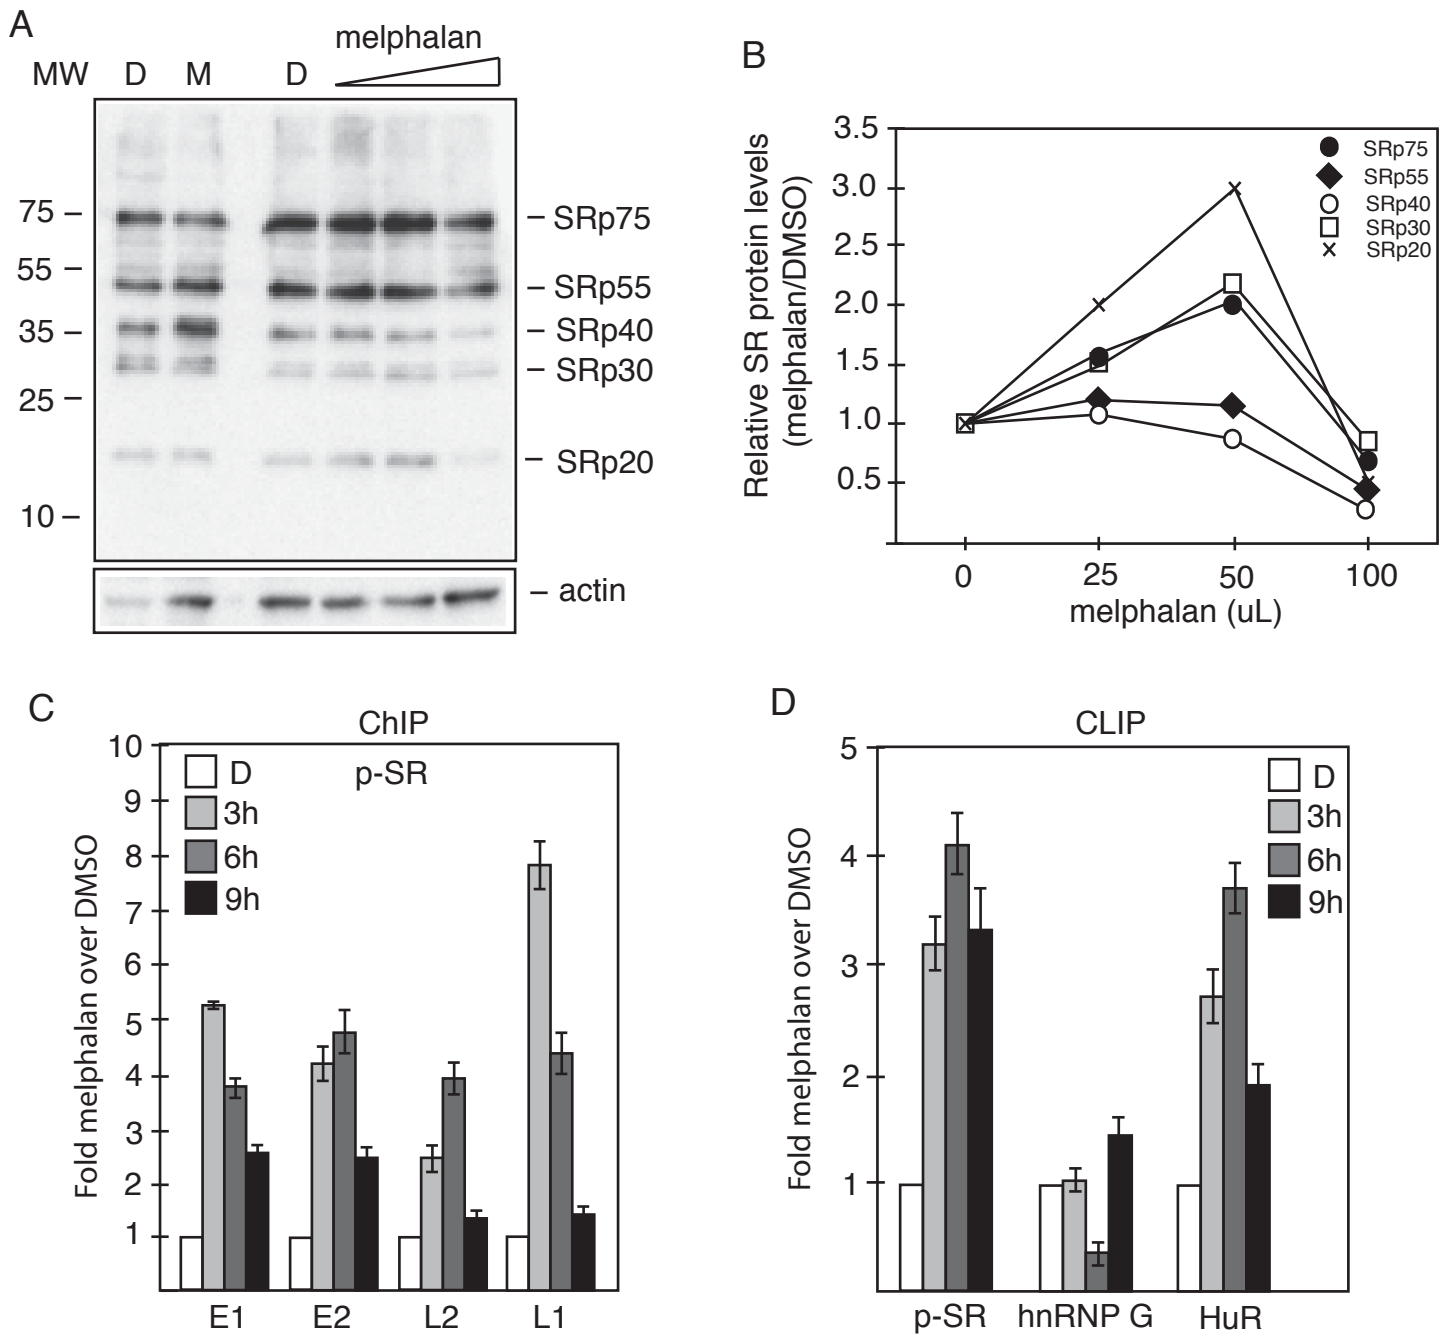

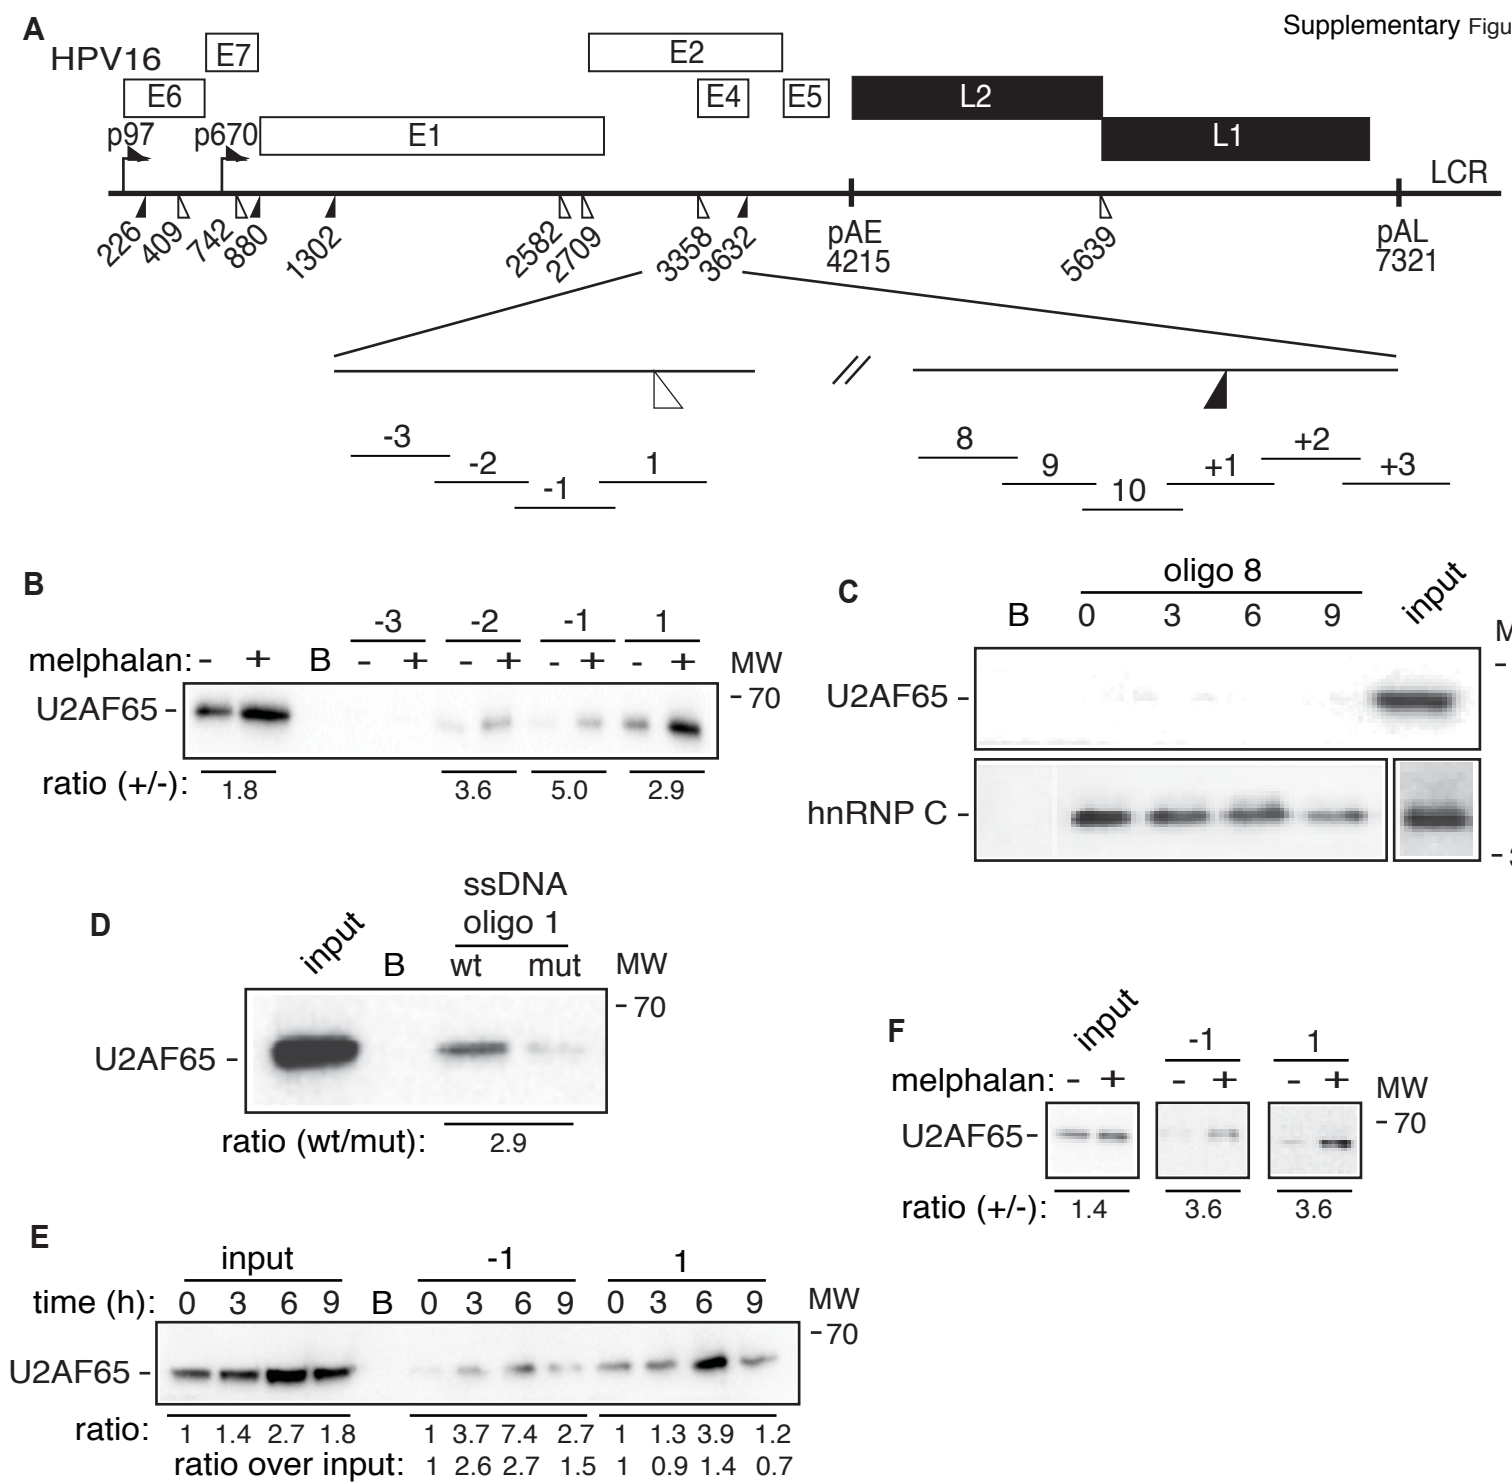

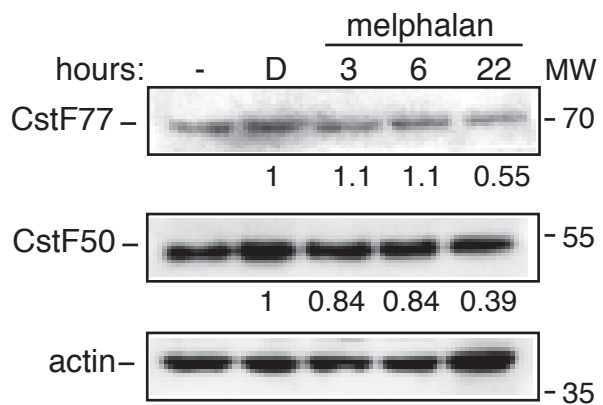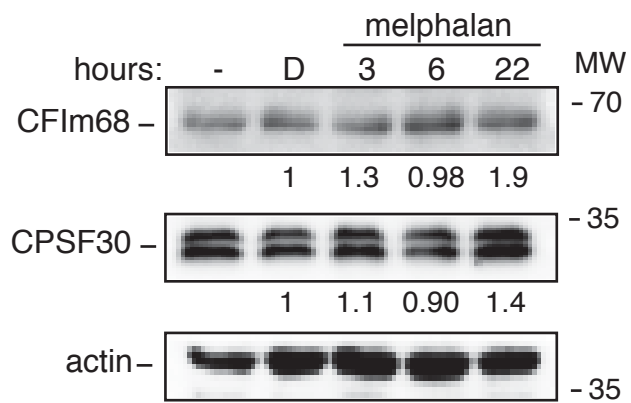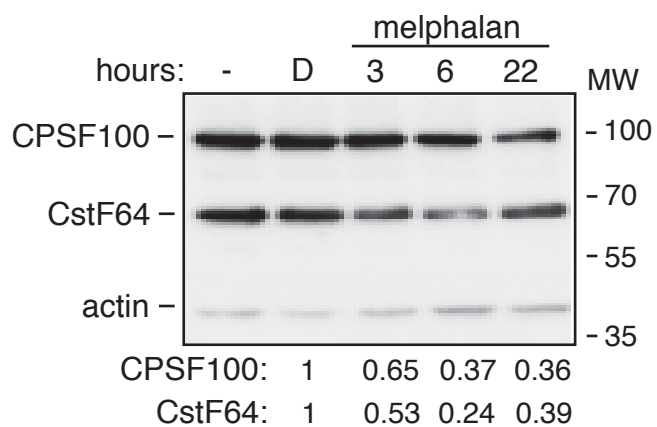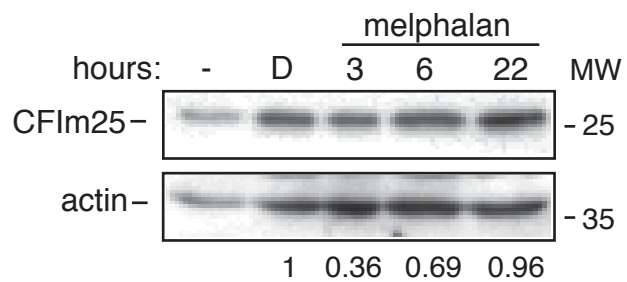

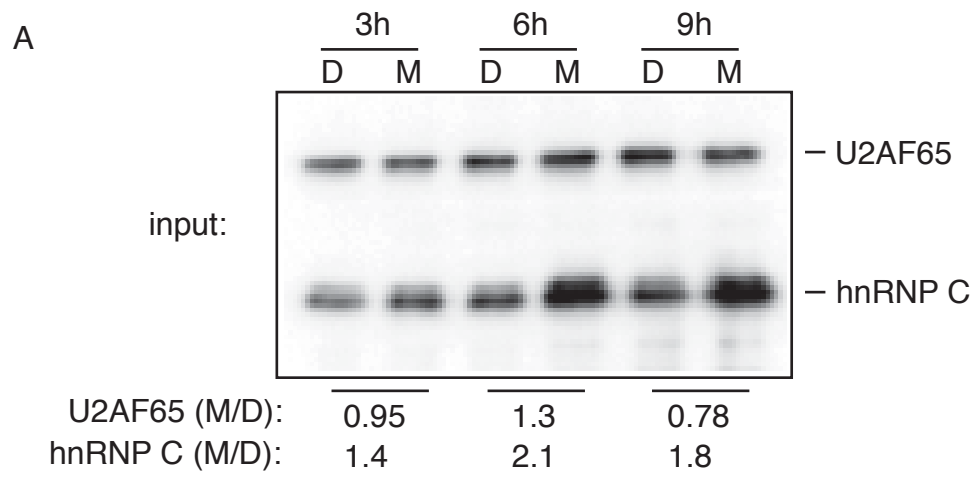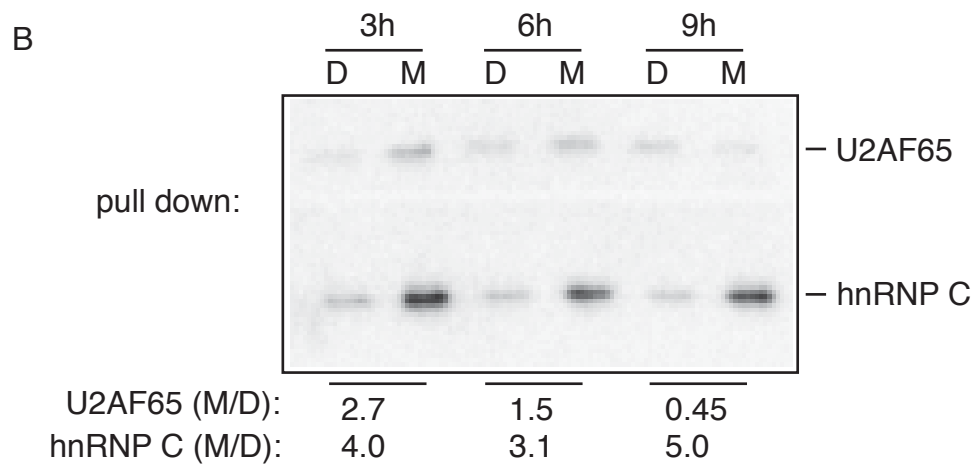

**C**

|                                        | 3h  | 6h   | 9h   |
|----------------------------------------|-----|------|------|
| pull down (M/D)/input (M/D) (U2AF65):  | 2.8 | 0.77 | 0.58 |
| pull down (M/D)/input (M/D) (hnRNP C): | 2.9 | 1.5  | 2.8  |

**Supplementary Table 1. Cancer drugs that activate HPV16 late gene expression.**

| <b>Function</b>          | <b>Substance</b>         |
|--------------------------|--------------------------|
| Akt kinase inhibitor     | GC0068                   |
| Kinase inhibitor         | Lapatinib                |
| DNA alkylation           | Uracil mustard           |
| DNA alkylation           | Melphalan hydrochloride  |
| DNA alkylation           | Triethylenemelamine      |
| Topoisomerase inhibitor  | Topotecan hydrochloride  |
| Topoisomerase inhibitor  | Irinotecan hydrochloride |
| Topoisomerase inhibitor  | Teniposide               |
| DNA breakage             | Bleomycin sulfate        |
| Microtubule disruptive   | Vinblastine sulfate      |
| Microtubule disruptive   | Cabazitaxel              |
| DNA synthesis inhibitor  | Nelarabine               |
| Hormone receptor agonist | Megestrol acetate        |

**Supplementary Table 2.**

| NCS ID | Common name              | sLuciferase Fold over DMSO |             |            |              |
|--------|--------------------------|----------------------------|-------------|------------|--------------|
|        |                          | 6hrs mean                  | 6hrs STDEV. | 22hrs mean | 22hrs STDEV. |
| 32065  | Hydroxyurea              | 1,051                      | 0,238       | 0,841      | 0,393        |
| 1390   | Allopurinol              | 1,071                      | 0,172       | 0,902      | 0,316        |
| 19893  | Flurouracil              | 1,239                      | 0,45        | 1,118      | 0,647        |
| 752    | Thioguanine              | 0,728                      | 0,096       | 0,715      | 0,082        |
| 755    | Mercaptopurine           | 0,899                      | 0,085       | 0,87       | 0,069        |
| 762    | Mechloretham             | 0,91                       | 0,38        | 0,793      | 0,481        |
| 6396   | Thiotepa                 | 0,511                      | 0,326       | 0,438      | 0,256        |
| 18509  | Aminolevulinic           | 0,895                      | 0,356       | 0,962      | 0,321        |
| 45388  | Dacarbazine              | 0,871                      | 0,077       | 0,851      | 0,08         |
| 92859  | Arsenic trioxide         | 0,998                      | 0,254       | 0,899      | 0,291        |
| 362856 | Temozolomid              | 0,911                      | 0,022       | 0,985      | 0,082        |
| 750    | Busulfan                 | 0,804                      | 0,208       | 0,6        | 0,044        |
| 13875  | Altretamine              | 1,047                      | 0,118       | 0,859      | 0,08         |
| 27640  | Floxuridine              | 1,166                      | 0,504       | 1,124      | 0,54         |
| 45923  | Methoxsalen              | 1,049                      | 0,317       | 0,935      | 0,379        |
| 79037  | Lomustine                | 1,044                      | 0,309       | 1,165      | 0,321        |
| 102816 | Azacitidine              | 0,944                      | 0,14        | 0,536      | 0,49         |
| 127716 | Decitabine               | 1,2                        | 0,43        | 1,124      | 0,523        |
| 409962 | Carmustine               | 0,703                      | 0,053       | 0,985      | 0,346        |
| 26271  | Cyclophosphamide         | 1,04                       | 0,277       | 1,431      | 0,81         |
| 34462  | Uracil mustard           | 2,738                      | 0,255       | 5,448      | 4,215        |
| 63878  | Cytarabine hydrochloride | 1,128                      | 0,427       | 1,812      | 0,607        |
| 66847  | Thalidomine              | 1,047                      | 0,288       | 1,182      | 0,209        |
| 77213  | Procarbazine             | 1,047                      | 0,288       | 1,734      | 0,102        |
| 85998  | Streptozocin             | 1,032                      | 0,269       | 0,83       | 0,326        |
| 105014 | Cladribine               | 1,318                      | 0,379       | 1,673      | 0,32         |
| 109724 | Ifosfamide               | 0,987                      | 0,236       | 0,9        | 0,382        |
| 119875 | Cisplatin                | 1,036                      | 0,125       | 0,857      | 0,238        |
| 122758 | Tretinoin                | 0,829                      | 0,224       | 0,843      | 0,063        |
| 169780 | Dexrazoxane              | 1,037                      | 0,126       | 1,035      | 0,368        |
| 218321 | Pentostatine             | 1,144                      | 0,286       | 0,921      | 0,464        |
| 613327 | Gemcitabine              | 1,051                      | 0,143       | 0,734      | 0,344        |
| 686673 | Nelarabine               | 1,034                      | 0,004       | 2,845      | 1,399        |
| 701852 | Vorinostat               | 1,107                      | 0,33        | 1,442      | 0,332        |
| 713563 | Exemestane               | 1,277                      | 0,301       | 1,1683     | 0,045        |
| 719344 | Anastrozole              | 1,3                        | 0,335       | 1,188      | 0,599        |
| 719345 | Letrozole                | 1,156                      | 0,259       | 1,128      | 0,191        |
| 747972 | Lenalidomide             | 1,067                      | 0,211       | 1,214      | 0,029        |
| 3088   | Chlorambucil             | 1,177                      | 0,343       | 1,516      | 0,006        |
| 26980  | Mitomycin                | 1,272                      | 0,49        | 1,569      | 0,454        |
| 38721  | Mitotane                 | 1,017                      | 0,164       | 0,786      | 0,347        |
| 606869 | Clofarabine              | 1,086                      | 0,209       | 1,185      | 0,343        |
| 25154  | Pipobroman               | 1,131                      | 0,215       | 1,076      | 0,226        |
| 71423  | Megestrol acetate        | 1,585                      | 0,667       | 2,314      | 0,384        |
| 138783 | Bendamustine             | 1,298                      | 0,527       | 1,833      | 0,69         |



|                |                |       |       |       |       |
|----------------|----------------|-------|-------|-------|-------|
| 241240         | Carboplatin    | 1,043 | 0,325 | 1,045 | 0,272 |
| 266046         | Oxaliplatin    | 1,02  | 0,293 | 0,94  | 0,314 |
| 312887         | Fluarabine ph  | 1,056 | 0,345 | 1,083 | 0,397 |
| 681239         | Bortezomib     | 0,944 | 0,154 | 0,835 | 0,272 |
| 712807         | Capecitabine   | 1,284 | 0,613 | 1,297 | 0,607 |
| 719627         | Celecoxib      | 0,935 | 0,309 | 0,957 | 0,269 |
| 750690         | Sunitinib      | 0,485 | 0,131 | 0,304 | 0,291 |
| 757441         | Axitinib       | 1,032 | 0,502 | 0,794 | 0,682 |
| 279836         | Mitoxantrone   | 0,507 | 0,172 | 0,34  | 0,322 |
| 698037         | Pemetrexed     | 0,765 | 0,619 | 1,209 | 0,261 |
| 715055         | Gefitinib      | 0,686 | 0,481 | 0,905 | 0,614 |
| 755986         | Vismodegib     | 1,059 | 0,121 | 0,829 | 0,24  |
| 756645         | Crizotinib     | 0,674 | 0,078 | 0,348 | 0,291 |
| 740            | Methotrexate   | 1,072 | 0,346 | 0,794 | 0,555 |
| 14229          | 14229          | 0,686 | 0,381 | 0,097 | 0,251 |
| 609699         | Topotecan hy   | 0,511 | 0,35  | 5,157 | 1,293 |
| 732517         | Dasatinib      | 0,712 | 0,099 | 0,447 | 0,262 |
| 737754         | Pazopanib hy   | 0,776 | 0,167 | 0,801 | 0,721 |
| 743414         | Imatinib       | 0,804 | 0,209 | 0,55  | 0,425 |
| 747971         | Sorafenib      | 0,96  | 0,159 | 0,449 | 0,321 |
| 747974         | Raloxifene     | 0,697 | 0,097 | 0,691 | 0,227 |
| 754230         | Pralatrexate   | 0,967 | 0,054 | 0,597 | 0,364 |
| 760766         | Vandetanib     | 0,68  | 0,034 | 0,443 | 0,263 |
| 761431         | Vemurafenib    | 0,871 | 0,173 | 0,641 | 0,348 |
| 747973         | Ixabepilone    | 0,809 | 0,245 | 1,442 | 0,31  |
| 754143         | Romidepsin     | 0,77  | 0,177 | 1,402 | 0,378 |
| 82151          | Daunorubicin   | 0,673 | 0,029 | 0,99  | 0,273 |
| 123127         | Doxorubicin h  | 0,565 | 0,103 | 0,286 | 0,278 |
| 141540         | Etoposide      | 0,991 | 0,388 | 1,312 | 0,866 |
| 180973         | Tamoxifen cit  | 0,681 | 0,005 | 0,369 | 0,309 |
| 745750         | Lapatinib      | 0,665 | 0,141 | 5,854 | 2,764 |
| 616348         | Irinotecan hyc | 2,392 | 1,002 | 3,514 | 0,546 |
| 719276         | Fulvestrant    | 0,82  | 0,37  | 0,915 | 0,441 |
| 122819         | Teniposide     | 0,616 | 0,16  | 2,796 | 0,435 |
| 246131         | Valrubicin     | 0,661 | 0,137 | 0,552 | 0,281 |
| <b>Plate 2</b> |                |       |       |       |       |
| 628503         | Docetaxel      | 0,775 | 0,219 | 0,84  | 0,206 |
| 761432         | Cabazitaxel    | 0,991 | 0,099 | 2,784 | 0,418 |
| 125973         | Paclitaxel     | 0,707 | 0,082 | 0,607 | 0,063 |
| 49842          | Vinblastine su | 1,01  | 0,167 | 2,241 | 0,144 |
| 67574          | Vincristine su | 1,156 | 0,184 | 1,563 | 0,212 |
| 226080         | Sirolimus      | 0,971 | 0,137 | 1,253 | 0,552 |
| 733504         | Everolimus     | 0,705 | 0,06  | 0,282 | 0,026 |
| 3053           | Dactinomycin   | 0,429 | 0,035 | 0,192 | 0,006 |
| 24559          | Plicamycin     | 1,03  | 0,041 | 1,676 | 0,57  |
| 125066         | Bleomycin su   | 1,013 | 0,068 | 2,934 | 0,287 |
| 608210         | Vinorelbine ta | 0,816 | 0,003 | 0,845 | 0,241 |
| 758252         | Carfilzomib    | 0,859 | 0,195 | 1,604 | 0,434 |

|        |                 |       |       |        |        |
|--------|-----------------|-------|-------|--------|--------|
| 369100 | Imiquimod       | 1,023 | 0,097 | 1,114  | 0,191  |
| 9706   | Triethyleneme   | 1,276 | 0,033 | 2,716  | 0,045  |
| 718781 | Erlotinib hydro | 0,884 | 0,011 | 0,907  | 0,242  |
| 296961 | Amifostine      | 0,915 | 0,055 | 0,977  | 0,197  |
| 721517 | Zoledronic a    | 0,927 | 0,234 | 0,847  | 0,132  |
| 749226 | Abiraterone     | 0,731 | 0,09  | 0,702  | 0,279  |
| 8806   | Melphalan hy    | 5,994 | 0,37  | 38,191 | 10,783 |
| 747599 | Nilotinib       | 1,156 | 0,112 | 1,973  | 0,439  |
| 702294 | Estramustine    | 1,135 | 0,248 | 1,258  | 0,066  |

STDEV= standard deviation from the mean

**Supplementary Table 3. PCR primers.**

| <b>RT-PCR primer name</b>                | <b>Amplified region</b> | <b>Sequence 5'-3'</b>                |
|------------------------------------------|-------------------------|--------------------------------------|
| 773s                                     | E4,L1,E2                | GCACACACGTAGACATTCGTACTTTG           |
| E4as                                     | E4                      | TGCTGCCTAATAGTTTCAGGAGAGG            |
| E2as                                     | E2                      | CCTGACCACCCGCATGAACTTCC              |
| 1302s                                    | E2                      | CATAGAGATGCAGTACAGGTTCT              |
| F-set3                                   | L2                      | GCACCCCTTTAACAGTAGATCC               |
| R-set3                                   | L2                      | TACAGATGGGTGAGTCAAAGTG               |
| L1as                                     | L1                      | GCAACATATTCATCCGTGCTTACAACC          |
| E4sVar                                   | E4                      | CCTCTCCTGAAATTATTAGGCAGCG            |
| P3-17dT                                  | 3'-RACE                 | GACTCGAGTCGACATCGATTTTTTTTTTTTTTTTTT |
| 68                                       | 3'-RACE-pAL             | CAGGTGGACAGATGCGCCAGCTG              |
| F-set2                                   | 3'-RACE-pAE             | TTGATACTGCATCCACAACATT               |
| atrip1s                                  | ATRIP                   | TCGAATTAGAGGTACTTCAGGCACA            |
| atrip1as                                 | ATRIP                   | TGGAGTTCAGACTGCAATGATTGGA            |
| atrip2s                                  | ATRIP                   | CTGTACATGTACATCACATCACGG             |
| atrip2as                                 | ATRIP                   | TCACATCAGGAAGCCCTCGGAT               |
| PHB2S                                    | PHB2                    | GTCAACGAGGTGCTCAAGAGTG               |
| PHB2as                                   | PHB2                    | CAAGGTTGTCAGCTGTGAGATAGATA           |
| F-GAPDH                                  | GAPDH                   | ACCCAGAAGACTGTGGATGG                 |
| R-GAPDH                                  | GAPDH                   | TTCTAGACGGCAGGTCAGGT                 |
| CMVS                                     | All mRNAs               | CGCAAATGGGCGGTAGGCGTG                |
| 757as                                    | All mRNAs               | CGTGTGTGCTTTGTACGCACAACCG            |
|                                          |                         |                                      |
| <b>ChIP and DIP PCR and qPCR primers</b> | <b>Amplified region</b> | <b>Sequence 5'-3'</b>                |
| E1F                                      | E1                      | AGTAGAGCTGCAAAAAGGAGATTA             |
| E1R                                      | E1                      | CTGACTACATGGTGTTCAGTCTC              |
| E2F                                      | E2                      | CTGGAAATCCTTTTTCTCAAGG               |
| E2R                                      | E2                      | CATTTTCATAATGTGTTAGTATTTTGTC         |
| E4F                                      | E4                      | ATCTGTGTTTAGCAGCAACGAA               |
| E4R                                      | E4                      | TGGAGCACTGTCCACTGAGTCT               |
| L2F                                      | L2                      | GACCCTGCTTTTGTAACCACTC               |
| L2R                                      | L2                      | ATGCTGGCCTATGTAAAGCAAC               |
| L1SF                                     | L1S                     | CCTTTAGTATCAGGTCCTGATATACCC          |
| L1SR                                     | L1S                     | GCAACATATTCATCCGTGCTTACAACC          |
| L1F                                      | L1                      | TTAGGTGTGGGCATTAGTGG                 |
| L1R                                      | L1                      | TCCCCTATAGGTGGTTTGCA                 |

**Supplementary Table 4. Antibodies.**

| <b>Antigen</b>             | <b>Vendor</b>       | <b>Cat #</b> |
|----------------------------|---------------------|--------------|
| ATM                        | Abcam               | ab32420      |
| p-ATM                      | Santa Cruz Biotech  | b81292       |
| ATR                        | Abcam               | ab2905       |
| BRCA1                      | Santa Cruz Biotech  | SC-642       |
| p-BRCA1                    | Santa Cruz Biotech  | SC-101647    |
| Chk2                       | Santa Cruz Biotech  | SC-9064      |
| p-Chk2                     | Santa Cruz Biotech  | SC-16297-R   |
| Chk1                       | Santa Cruz Biotech  | SC-8408      |
| p-Chk1                     | Santa Cruz Biotech  | SC-17922     |
| gH2AX                      | Abcam               | ab2893       |
| pan-H3Ac                   | Abcam               | ab47915      |
| pan-H4Ac                   | Active Motif        | 39243        |
| Histone H3                 | Cell signalling     | D2B12-4620S  |
| Histone H4                 | Abcam               | Ab10158      |
| BARD1                      | Bethyl laboratories | A300-263A    |
| U2AF65                     | Santa Cruz Biotech  | SC-53942     |
| SF3B                       | Bethyl laboratories | A300-996A    |
| BCLAF1                     | Santa Cruz Biotech  | SC-79204     |
| TRAP150                    | Santa Cruz Biotech  | SC-133250    |
| p-SR                       | Millipore           | MABE50       |
| hnRNP C                    | Santa Cruz Biotech  | SC-32308     |
| hnRNP G                    | Abcam               | ab118688     |
| hnRNP H                    | Abcam               | ab10374      |
| HuR                        | Santa Cruz Biotech  | SC-5261      |
| TIAR                       | Bethyl laboratories | A303-613A-T  |
| CPSF100                    | Sigma               | HPA024238    |
| CPSF30                     | Bethyl laboratories | A301-584A-M  |
| CstF64                     | Bethyl laboratories | A301-092A-M  |
| CstF77                     | Bethyl laboratories | A301-094A-T  |
| CstF50                     | Bethyl laboratories | A301-094A-T  |
| CFIm68                     | Bethyl laboratories | A301-357A-T  |
| CFIm25                     | Abcam               | ab183660     |
| Fip1                       | Santa Cruz Biotech  | SC-398392    |
| actin                      | Santa Cruz Biotech  | SC-1616      |
| melphalan                  | Abcam               | ab97554      |
| IgG Rabbit                 | Cell Signaling      | 2729P        |
| Anti mouse IgG (HRP)       | Sigma               | A9044        |
| Anti rabbit IgG (HRP)      | Sigma               | A4914        |
| Anti goat IgG (HRP)        | Sigma               | A8919        |
| Ms Kappa light chain (HRP) | Abcam               | ab99632      |
| Rb IgG light chain         | Abcam               | ab99697      |
| Anti FLAG tag              | Sigma               | F1804        |
